# Supplementary material for: Fewer severe infections with tranexamic acid in patients with hematologic malignancies
Source: PubMed Central journal article supplement — Res Pract Thromb Haemost. 2024 Mar 1;8(2):102358. doi: 10.1016/j.rpth.2024.102358 (PMC11043644; doi:10.1016/j.rpth.2024.102358), 2024-03-01
Supplement: mmc1.pdf [file mmc1.pdf]

**Supplemental Table 1. Causes of Grade 3+ Infections During Study Treatment**

|                                   | Allo      |           | Auto     |          | Chemo     |           | Total     |           | Total     |
|-----------------------------------|-----------|-----------|----------|----------|-----------|-----------|-----------|-----------|-----------|
|                                   | Placebo   | TXA       | Placebo  | TXA      | Placebo   | TXA       | Placebo   | TXA       |           |
|                                   | (n= 65)   | (n= 63)   | (n= 36)  | (n= 34)  | (n= 62)   | (n= 66)   | (n= 163)  | (n= 163)  |           |
| Infections (Grade 3+)             | 19 (29.2) | 12 (19.0) | 5 (13.9) | 1 ( 2.9) | 22 (35.5) | 16 (24.2) | 46 (28.2) | 29 (17.8) | 75 (23.0) |
| Other infection                   | 12 (18.5) | 9 (14.3)  | 2 ( 5.6) | 0 ( 0.0) | 13 (21.0) | 9 (13.6)  | 27 (16.6) | 18 (11.0) | 45 (13.8) |
| Lung infection                    | 2 ( 3.1)  | 2 ( 3.2)  | 1 ( 2.8) | 0 ( 0.0) | 6 ( 9.7)  | 4 ( 6.1)  | 9 ( 5.5)  | 6 ( 3.7)  | 15 ( 4.6) |
| Sepsis                            | 4 ( 6.2)  | 0 ( 0.0)  | 2 ( 5.6) | 0 ( 0.0) | 2 ( 3.2)  | 2 ( 3.0)  | 8 ( 4.9)  | 2 ( 1.2)  | 10 ( 3.1) |
| Skin infection                    | 3 ( 4.6)  | 1 ( 1.6)  | 0 ( 0.0) | 0 ( 0.0) | 4 ( 6.5)  | 0 ( 0.0)  | 7 ( 4.3)  | 1 ( 0.6)  | 8 ( 2.5)  |
| Sinusitis                         | 0 ( 0.0)  | 1 ( 1.6)  | 0 ( 0.0) | 0 ( 0.0) | 2 ( 3.2)  | 1 ( 1.5)  | 2 ( 1.2)  | 2 ( 1.2)  | 4 ( 1.2)  |
| Upper respiratory infection       | 0 ( 0.0)  | 1 ( 1.6)  | 0 ( 0.0) | 0 ( 0.0) | 1 ( 1.6)  | 1 ( 1.5)  | 1 ( 0.6)  | 2 ( 1.2)  | 3 ( 0.9)  |
| Catheter related infection        | 0 ( 0.0)  | 0 ( 0.0)  | 0 ( 0.0) | 1 ( 2.9) | 1 ( 1.6)  | 0 ( 0.0)  | 1 ( 0.6)  | 1 ( 0.6)  | 2 ( 0.6)  |
| Soft tissue infection             | 0 ( 0.0)  | 0 ( 0.0)  | 0 ( 0.0) | 0 ( 0.0) | 1 ( 1.6)  | 1 ( 1.5)  | 1 ( 0.6)  | 1 ( 0.6)  | 2 ( 0.6)  |
| Kidney infection                  | 0 ( 0.0)  | 0 ( 0.0)  | 0 ( 0.0) | 0 ( 0.0) | 0 ( 0.0)  | 1 ( 1.5)  | 0 ( 0.0)  | 1 ( 0.6)  | 1 ( 0.3)  |
| Meningitis                        | 0 ( 0.0)  | 0 ( 0.0)  | 0 ( 0.0) | 0 ( 0.0) | 1 ( 1.6)  | 0 ( 0.0)  | 1 ( 0.6)  | 0 ( 0.0)  | 1 ( 0.3)  |
| Salivary gland infection          | 1 ( 1.5)  | 0 ( 0.0)  | 0 ( 0.0) | 0 ( 0.0) | 0 ( 0.0)  | 0 ( 0.0)  | 1 ( 0.6)  | 0 ( 0.0)  | 1 ( 0.3)  |
| Small intestine infection         | 1 ( 1.5)  | 0 ( 0.0)  | 0 ( 0.0) | 0 ( 0.0) | 0 ( 0.0)  | 0 ( 0.0)  | 1 ( 0.6)  | 0 ( 0.0)  | 1 ( 0.3)  |
| Urinary tract infection           | 0 ( 0.0)  | 0 ( 0.0)  | 0 ( 0.0) | 0 ( 0.0) | 1 ( 1.6)  | 0 ( 0.0)  | 1 ( 0.6)  | 0 ( 0.0)  | 1 ( 0.3)  |
| Sepsis or bacteremia <sup>1</sup> | 13 (20.0) | 8 (12.7)  | 4 (11.1) | 0 (0.0)  | 12 (19.4) | 11 (16.7) | 29 (17.8) | 19 (11.7) | 48 (15.7) |

<sup>1</sup> Bacteremia adverse events are a subset of the "other infection" adverse events, identified by reviewing the verbatim descriptions

# ATREAT Flow Diagram

## Enrollment

Assessed for eligibility (n=3120)

Excluded (n=2764)  
 Not meeting inclusion criteria (n=1002)  
 Meeting exclusion criteria (n=1058)  
 History of arterial or venous TE (n=727)  
 Anti-coagulant therapy (n=242)  
 Elevated platelet transfusion threshold (n=130)  
 MD refusal (n=98)  
 Other (n=256)  
 Declined consent (n=816)

Enrolled (n=356)

Not randomized (n=19)  
 Lost eligibility (n=14)  
 Withdrew (n=5)

Randomized (n=337)

Placebo

n=169

TXA

n=168

Activated (n=165)  
 Randomized, not activated (n=4)  
 Received study drug (n=163)  
 Activated, did not receive study drug (n=2)

## Allocation

Activated (n=165)  
 Randomized, not activated (n=3)  
 Received study drug (n=163)  
 Activated, did not receive study drug (n=2)

Completed 30-day follow-up (n=156)  
 Completed 120-day follow-up (n=138)

## Follow-Up

Completed 30-day follow-up (n=159)  
 Completed 120-day follow-up (n=141)

Analyzed (n=163)  
 Excluded from analysis (n=2)  
 Due to not receiving study drug (n=2)

## Analysis

Analyzed (n=163)  
 Excluded from analysis (n=2)  
 Due to not receiving study drug (n=2)

**Supplemental Figure 1** : Recruitment, Enrollment, Randomization and Follow-up in the A-TREAT trial.
